# Supplementary material
Source: PubMed Central journal article supplement (PMC8052292)
Supplement: NIHMS1678195-supplement-2.pdf [file NIHMS1678195-supplement-2.pdf]

## SUPPLEMENTARY MATERIALS

### Molecular characterisation of titin N2A and its binding of CARP reveals a titin/actin cross-linking mechanism

Zhou et al, 2021

#### Figure S1: Domains UN2A and Ig81 do not interact with each other

UN2A and Ig81 samples were produced independently and mixed post-production at a 1:1 molar ratio in 25mM HEPES pH 7.5, 100mM NaCl. The incubated mixture was subjected to size exclusion chromatography on a Superdex 75 16/60 column (GE Healthcare) and co-segregation monitored. The chromatogram showed two resolved peaks, indicating that UN2A and Ig81 species did not form a complex in solution. The chromatogram and associated SDS-PAGE are shown.

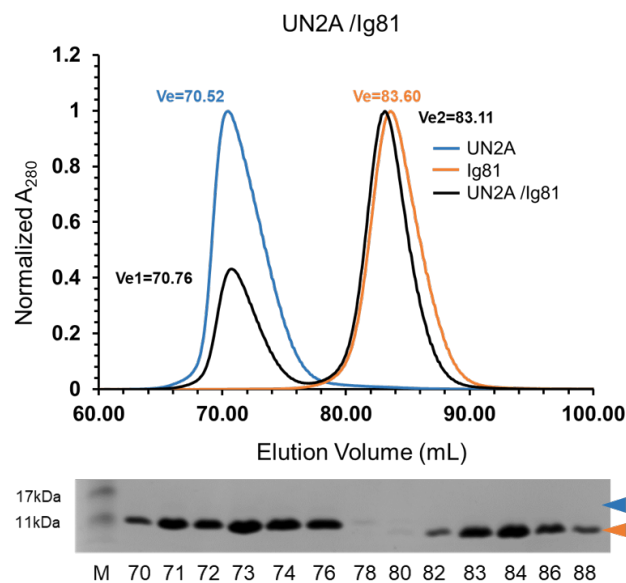

**Figure S2: NMR-guided modelling of UN2A<sup>34-73</sup>**

A total of 32500 model decoys of UN2A<sup>34-73</sup> were calculated using CS-ROSETTA and subjected to cluster analysis in CALIBUR. **A.** Top ten models calculated in CS-ROSETTA with experimental NMR restraints ( $\text{RMSD}_{\text{C}\alpha} = 2.3 \text{ \AA}$ ); **B.** Top ten models from the largest CALIBUR cluster of 10216 models (i.e. most common conformation) with a corresponding  $\text{RMSD}_{\text{C}\alpha} = 0.63 \text{ \AA}$ . **C.** and **D.** Plots of ROSETTA energy score versus  $\text{RMSD}_{\text{C}\alpha}$  against the lowest-energy model for the calculated UN2A decoys. In **C.** the values for 32500 decoys calculated in CS-ROSETTA are shown. In **D.**, the values correspond to 10216 decoys selected as primary conformational subpopulation with CALIBUR.

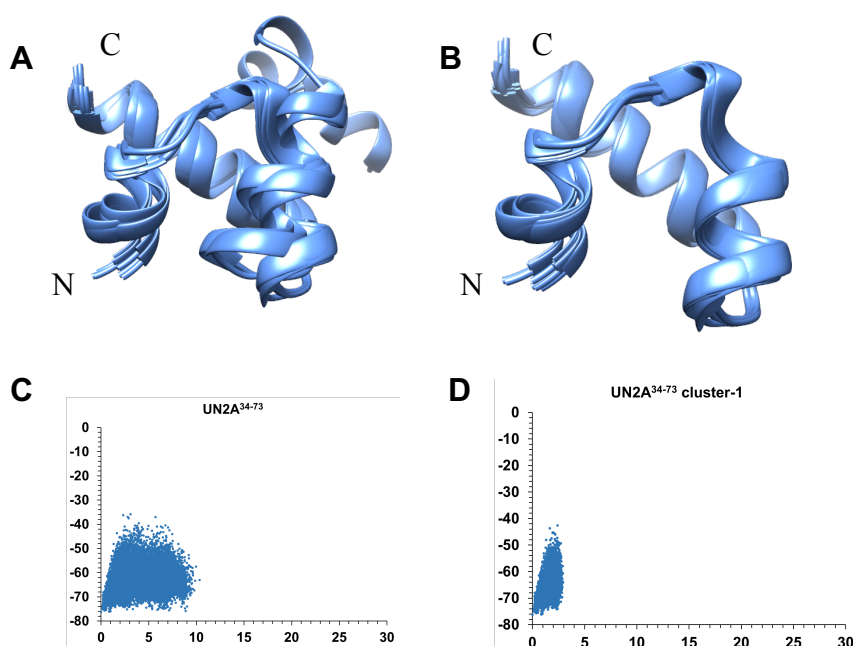

**Figure S3: Relative fractional deuterium uptake (RFDU) of peptides forming the CARP interface in UN2A-Ig81 measured by HDX-MS**

Shown are UN2A-Ig81 peptides presenting RFDU differences between their single state (blue) and in the presence of CARP<sup>106-319</sup> (red).

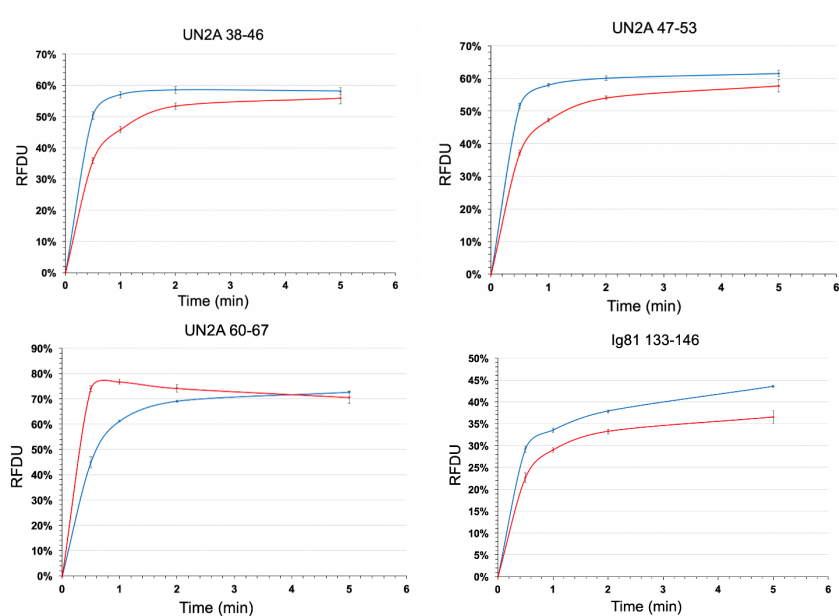

**Figure S4:  $^1\text{H}$ - $^{15}\text{N}$  HSQC NMR spectrum of UN2A free and bound to CARP**

**A.**  $^1\text{H}$ - $^{15}\text{N}$  HSQC spectrum of the UN2A/CARP<sup>106-319</sup> complex in a 1:2 molar ratio (red) compared to that of free UN2A (black). CARP<sup>106-319</sup> was not isotopically labelled; **B.** Titration process of three representative cross-signals (corresponding to the blue selection boxes in A). The CARP<sup>106-319</sup>/UN2A molar ratio (C/U) is stated; **C.** The affected residues (total signal loss) upon CARP-interaction as monitored by NMR titration are mapped on the UN2A<sup>34-73</sup> model (red). The full-length UN2A sequence is shown below with the UN2A<sup>34-73</sup> sequence boxed and the amino acids with a changed NMR signal upon CARP presence indicated in red. NMR data show that the C-terminal helix is affected by CARP binding. HDX-MS data revealed that this helix is not direct part of the interface but, instead, that the helix is displaced upon binding of CARP to the frontal helical  $\alpha$ -hairpin.

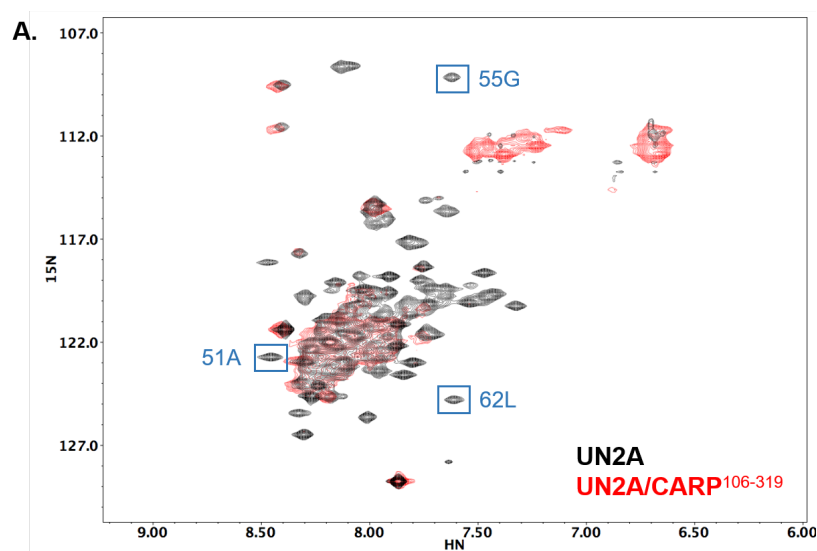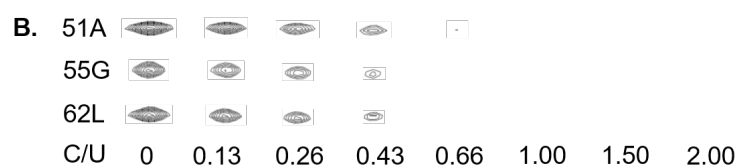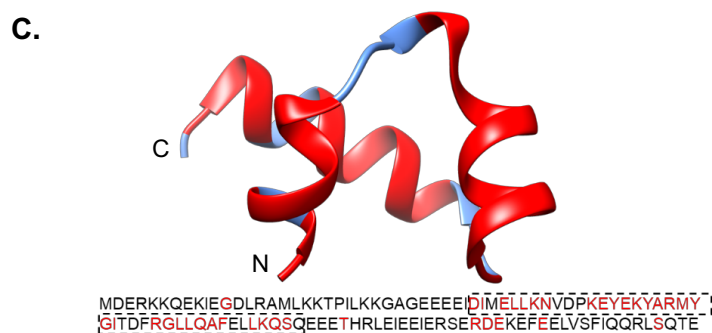

**Figure S5: Identification of the titin-interface on CARP**

Deuterium RFU values for free (blue) and UN2A-Ig81 bound (red) CARP<sup>106-319</sup>. Values indicate the H/D exchange after 0.5 min incubation time;

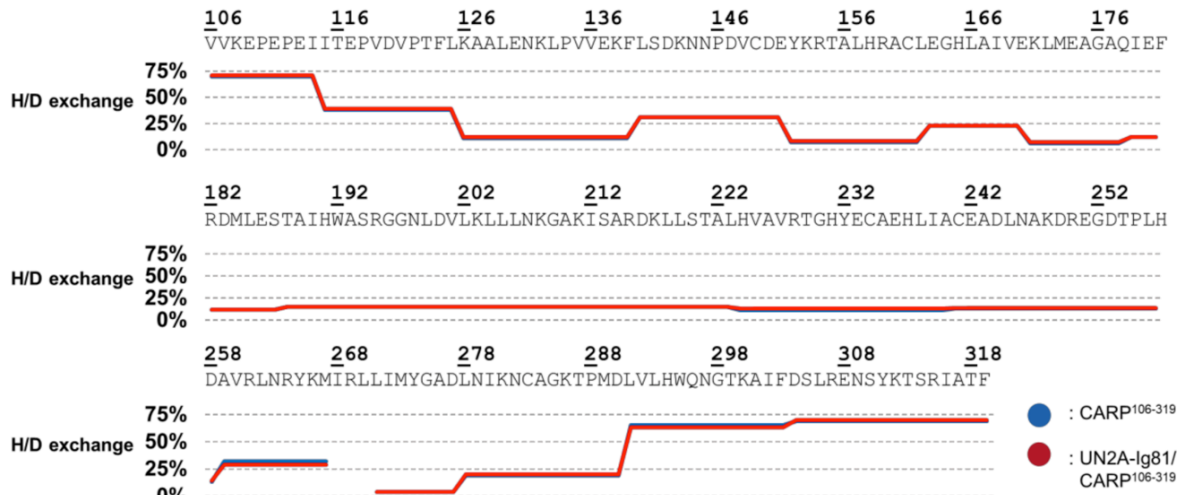

**Figure S6: Ca<sup>2+</sup>-dependence of actin co-sedimentation results**

The actin co-sedimentation of (A) UN2A-Ig81, (B) UN2A, (C) CARP<sup>106-319</sup>/UN2A-Ig81 and (D) CARP<sup>106-319</sup>/UN2A was tested in the presence and absence of calcium. UN2A-Ig81 and UN2A do not co-sediment with actin significantly. In the presence of CARP<sup>106-319</sup>, both titin segments co-sediment with actin noticeably. CARP<sup>106-319</sup> also co-sediments with actin as single species; E. SDS-PAGE band intensity as estimated by densitometric quantitation reporting on Ca<sup>2+</sup>-sensitivity of F-actin binding. Samples were tested in the presence of calcium (2 mM CaCl<sub>2</sub>) or in its absence (2 mM EGTA). Binding was not found to be dependent on calcium.

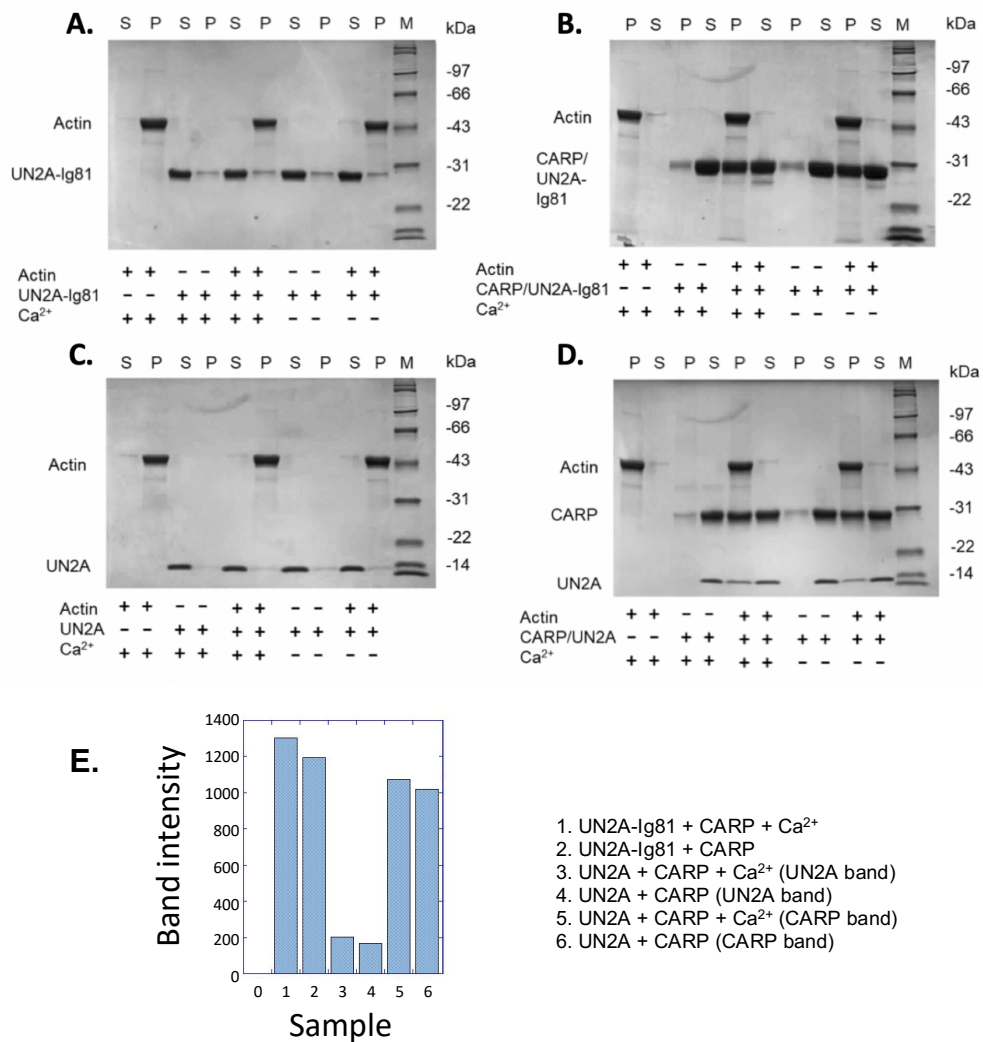

**Figure S7: CARP immunoprecipitation from heart lysates**

Silver-stained SDS-PAGE of whole heart lysates (input) and immunoprecipitated proteins (IP pellet). As guidance, the locations where bands from selected proteins are expected are indicated. In this study, proteins were identified by mass spectrometry performed on the whole immuno-precipitate, not from bands excised from the gel.

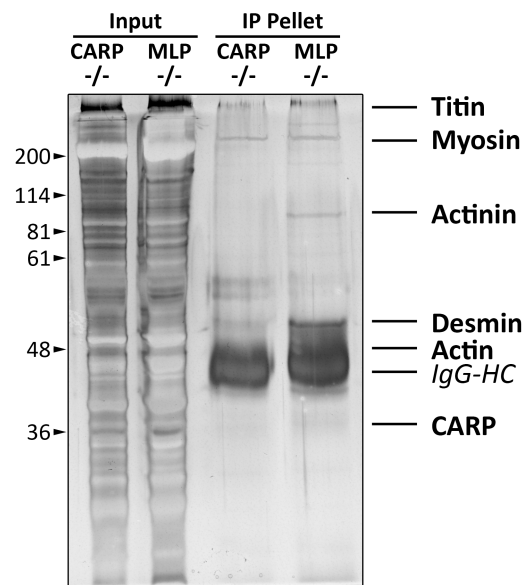**Table S1: Analysis of single nucleotide polymorphisms in human cohorts**

Records as obtained from gnomAD v2.1.1 and v3. Regions for which structural models exist are indicated with a blue background. Residues mapping to the CARP/titin-N2A interface are shown in red.  $\Delta\Delta G$  values over 2.5 kcal/mol calculated on the crystal structure of Ig81 using FoldX are indicative of potential onset of structural damage. This information, together with inspection of structural 3D-models using Missense3D as well as manual *in silico* residue replacement, lead us to identify two **single nucleotide variants** (W9617 and G9659, in bold) as potential destabilizers of this domain of titin. Analysis of N2A models did not reveal structural deleterious mutations in that domain. In Ig81, residue W9617 (W146 in this study) corresponds to a highly conserved tryptophan in the hydrophobic core of this domain that is signature of the Ig fold. Residue G9659 (G188 in this study) is the defining feature of the  $\beta$ -turn type II' of the FG  $\beta$ -hairpin in Ig81 and required for hairpin formation. The substitution of either of these residues, might destabilize Ig81 and weaken (but not abolish) CARP binding. Potentially, the destabilization might only manifest itself significantly in mechanically stretched states of titin.

| rare sequence code | original bp | changed bp | originalAA | AA number Q8WZ42 | NewAA | Occurrence | Meta-SNP | RI | FoldX $\Delta\Delta G$ (kcal/mol) | 3D-Missense |
|--------------------|-------------|------------|------------|------------------|-------|------------|----------|----|-----------------------------------|-------------|
| rs760656457        | C           | T          | Asp        | 9472 (1)         | Asn   | 8,03E-06   | Neutral  | 8  |                                   |             |
| rs1256487014       | T           | A          | Asp        | 9472 (1)         | Val   | 4,01E-06   | Neutral  | 9  |                                   |             |
| rs775325497        | T           | A          | Glu        | 9473 (2)         | Asp   | 6,98E-06   | Neutral  | 7  |                                   |             |
| rs771829036        | A           | G          | Ile        | 9480 (9)         | Thr   | 8,05E-06   | Neutral  | 7  |                                   |             |
| rs1254367559       | C           | T          | Gly        | 9482 (11)        | Asp   | 1,15E-05   | Neutral  | 5  |                                   |             |
| rs1210593236       | C           | T          | Asp        | 9483 (12)        | Asn   | 6,98E-06   | Neutral  | 5  |                                   |             |
| rs781737736        | C           | T          | Ala        | 9486 (15)        | Thr   | 6,98E-06   | Neutral  | 7  |                                   |             |
| rs1356650510       | A           | G          | Ile        | 9493 (22)        | Thr   | 2,98E-05   | Neutral  | 9  |                                   |             |
| rs755553000        | T           | C          | Ile        | 9493 (22)        | Val   | 6,98E-06   | Neutral  | 8  |                                   |             |
| rs1440897182       | T           | G          | Leu        | 9494 (23)        | Phe   | 6,98E-06   | Neutral  | 6  |                                   |             |
| rs780561066        | T           | G          | Lys        | 9495 (24)        | Gln   | 6,98E-06   | Neutral  | 9  |                                   |             |
| rs758873870        | C           | A          | Gly        | 9499 (28)        | Ala   | 4,40E-06   | Neutral  | 7  |                                   |             |
| rs962438568        | C           | T          | Gly        | 9499 (28)        | Glu   | 6,98E-06   | Neutral  | 6  |                                   |             |
| rs777309739        | C           | A          | Asp        | 9502 (31)        | Asp   | 2,09E-05   | Neutral  | 7  |                                   |             |
| rs752150259        | C           | A          | Asp        | 9505 (34)        | Tyr   | 1,40E-05   | Neutral  | 7  |                                   |             |
| rs767075303        | A           | G          | Ile        | 9506 (35)        | Thr   | 6,98E-06   | Neutral  | 7  |                                   |             |
| rs1223252531       | G           | T          | Leu        | 9509 (38)        | Ile   | 2,79E-05   | Neutral  | 7  |                                   |             |
| rs578069922        | T           | C          | Asn        | 9512 (41)        | Ser   | 8,09E-06   | Neutral  | 6  |                                   |             |
| rs558220856        | T           | A          | Asp        | 9514 (43)        | Val   | 4,04E-06   | Neutral  | 6  |                                   |             |
| rs369990929        | T           | C          | Tyr        | 9518 (47)        | Cys   | 9,45E-06   | Disease  | 4  |                                   |             |
| rs1234119302       | G           | A          | Ala        | 9522 (51)        | Val   | 4,02E-06   | Neutral  | 7  |                                   |             |
| rs766144409        | C           | A          | Ala        | 9522 (51)        | Ser   | 6,98E-06   | Neutral  | 6  |                                   |             |
| rs773444238        | C           | A          | Arg        | 9523 (52)        | His   | 2,55E-05   | Neutral  | 7  |                                   |             |
| rs794727011        | G           | A          | Arg        | 9523 (52)        | Cys   | 1,40E-05   | Neutral  | 7  |                                   |             |
| rs769913782        | C           | T          | Met        | 9524 (53)        | Ile   | 1,40E-05   | Neutral  | 7  |                                   |             |
| rs776836480        | C           | T          | Gly        | 9526 (55)        | Glu   | 6,98E-06   | Disease  | 4  |                                   |             |
| rs878919397        | T           | G          | Thr        | 9528 (57)        | Pro   | 6,98E-06   | Disease  | 4  |                                   |             |
| rs777030251        | C           | T          | Arg        | 9531 (60)        | Gln   | 1,21E-05   | Neutral  | 5  |                                   |             |
| rs768829835        | G           | A          | Ala        | 9536 (65)        | Val   | 6,98E-06   | Neutral  | 6  |                                   |             |
| rs760859295        | T           | C          | Glu        | 9538 (67)        | Gly   | 6,98E-06   | Neutral  | 6  |                                   |             |
| rs532933900        | T           | C          | Lys        | 9541 (70)        | Arg   | 4,02E-06   | Neutral  | 6  |                                   |             |
| rs939913351        | C           | T          | Glu        | 9547 (76)        | Lys   | 1,40E-05   | Neutral  | 6  |                                   |             |
| rs767705843        | T           | C          | His        | 9549 (78)        | Arg   | 4,03E-06   | Neutral  | 7  |                                   |             |
| rs1430193759       | G           | C          | His        | 9549 (78)        | Asp   | 6,98E-06   | Neutral  | 7  |                                   |             |
| rs367712022        | A           | G          | Ile        | 9553 (82)        | Thr   | 8,05E-06   | Neutral  | 8  |                                   |             |
|                    | A           | G          | Glu        | 9557 (86)        | Gln   | 6,98E-06   | Neutral  | 7  |                                   |             |
|                    | C           | T          | Arg        | 9561 (90)        | Lys   | 1,21E-05   | Neutral  | 9  |                                   |             |
|                    | G           | C          | Asp        | 9562 (91)        | Glu   | 1,40E-05   | Neutral  | 9  |                                   |             |
|                    | C           | T          | Glu        | 9563 (92)        | Lys   | 2,79E-05   | Neutral  | 7  |                                   |             |
|                    | T           | G          | Gln        | 9574 (103)       | Pro   | 6,98E-06   | Neutral  | 5  |                                   |             |
|                    | G           | A          | Thr        | 9580 (109)       | Ile   | 1,15E-05   | Neutral  | 5  | 1,22                              |             |
|                    | G           | A          | Pro        | 9582 (111)       | Leu   | 7,73E-06   | Neutral  | 5  | 0,12                              |             |
|                    | C           | T          | Val        | 9583 (112)       | Ile   | 6,98E-06   | Neutral  | 5  | 0,99                              |             |
|                    | A           | C          | Leu        | 9585 (114)       | Arg   | 6,98E-06   | Neutral  | 4  | 2,69                              |             |
|                    | A           | G          | Ile        | 9589 (118)       | Thr   | 1,03E-05   | Neutral  | 4  | 5,22                              |             |
|                    | C           | G          | Val        | 9594 (123)       | Leu   | 1,40E-05   | Neutral  | 4  |                                   |             |



|              |   |   |     |            |     |          |         |   |       |
|--------------|---|---|-----|------------|-----|----------|---------|---|-------|
| rs768314420  | T | C | Asp | 9599 (128) | Gly | 1,03E-05 | Neutral | 5 | 2,14  |
| rs768314420  | T | A | Asp | 9599 (128) | Val | 4,06E-06 | Neutral | 5 | 0,75  |
| rs373651676  | A | G | Ile | 9604 (133) | Thr | 3,09E-05 |         |   | 2,81  |
| rs377147236  | T | G | Asn | 9609 (138) | Thr | 7,73E-06 |         |   | 1,77  |
| rs377147236  | T | A | Asn | 9609 (138) | Ile | 1,03E-05 |         |   | -0,21 |
| rs1204774037 | C | T | Glu | 9612 (141) | Lys | 2,79E-05 |         |   | -0,08 |
| rs757077819  | A | C | Ile | 9613 (142) | Ser | 2,06E-05 | Disease | 4 | 2,92  |
| rs373215746  | T | C | Ile | 9613 (142) | Val | 6,98E-06 | Neutral | 6 | 1,04  |
| rs1300557715 | A | G | Leu | 9615 (144) | Pro | 1,22E-05 |         |   | 3,02  |
| rs753689443  | G | T | Leu | 9615 (144) | Ile | 6,98E-06 | Neutral | 5 | 1,25  |
| rs764352461  | G | A | Ser | 9616 (145) | Leu | 2,15E-05 |         |   | -0,59 |
| rs1046404085 | C | A | Trp | 9617 (146) | Cys | 6,98E-06 | Disease | 5 | 5,59  |
| rs1428709009 | T | C | Tyr | 9618 (147) | Cys | 4,08E-06 |         |   | 2,26  |
| rs766917273  | C | G | Ser | 9627 (156) | Thr | 4,07E-06 | Neutral | 5 | 2,06  |
| rs766917273  | C | T | Ser | 9627 (156) | Asn | 4,07E-06 | Neutral | 6 | 1,44  |
| rs763249086  | T | C | Asp | 9628 (157) | Gly | 8,14E-06 | Neutral | 5 | 0,07  |
| rs1268571982 | T | G | Lys | 9629 (158) | Thr | 4,07E-06 |         |   | 3,09  |
|              | T | C | Ser | 9633 (162) | Gly | 6,98E-06 | Neutral | 5 | 0,12  |
| rs1482211815 | A | G | Ile | 9634 (163) | Thr | 4,06E-06 |         |   | 0,9   |
| rs773555150  | C | G | Asp | 9635 (164) | His | 6,98E-06 | Neutral | 5 | 0,55  |
| rs1201726118 | C | T | Gly | 9636 (165) | Asp | 1,15E-05 | Disease | 4 | 4,75  |
|              | C | A | Gly | 9636 (165) | Cys | 1,40E-05 | Disease | 4 | 4,2   |
| rs182332374  | C | T | Arg | 9638 (167) | Gln | 1,03E-05 | Neutral | 4 | -0,71 |
| rs1255328557 | T | C | His | 9639 (168) | Arg | 4,05E-06 |         |   | 0,37  |
| rs778649000  | T | C | Lys | 9644 (173) | Arg | 1,21E-05 | Neutral | 8 | 0,37  |
| rs1400936440 | T | C | Lys | 9649 (178) | Arg | 4,03E-06 | Neutral | 9 | -0,25 |
|              | T | A | Lys | 9649 (178) | Ile | 1,40E-05 | Neutral | 7 | 0,42  |
| rs756024325  | C | T | Gly | 9652 (181) | Asp | 8,05E-06 | Disease | 6 | 1,35  |
| rs961816213  | C | T | Gly | 9652 (181) | Ser | 6,98E-06 |         |   | 3     |
|              | T | C | Asn | 9653 (182) | Ser | 6,98E-06 |         |   | 0,68  |
| rs1183241604 | C | T | Gly | 9659 (188) | Asp | 4,02E-06 | Disease | 4 | 9,17  |
| rs1254687485 | G | A | Pro | 9660 (189) | Ser | 6,98E-06 |         |   | 1,71  |
|              | C | A | Ala | 9663 (192) | Ser | 1,40E-05 | Neutral | 8 | -0,08 |
|              | C | T | Ala | 9663 (192) | Thr | 2,65E-04 |         |   | 1,49  |
| rs200745162  | C | T | Ala | 9665 (194) | Thr | 6,28E-05 | Neutral | 4 | 1,63  |
|              | G | T | Leu | 9667 (196) | Ile | 6,98E-06 | Neutral | 4 | 2,02  |
| rs376644553  | A | G | Ile | 9669 (198) | Thr | 3,36E-05 | Neutral | 8 | 1,05  |
| rs376644553  | A | T | Ile | 9670 (199) | Asn | 4,55E-05 | Neutral | 7 | 1,06  |
| rs762584154  | T | C | Glu | 9671 (200) | Gly | 1,21E-05 | Neutral | 8 | 0,49  |

Cavity altered

Disallowed phi/psi
